# Supplementary material for: Charged porous organic frameworks bearing heteroatoms with enhanced isosteric enthalpies of gas adsorption
Source: Royal Society of Chemistry journal article supplement (doi:10.1039/c7ra12860f), 2018-01-01
Supplement: c7ra12860f1.pdf [file c7ra12860f1.pdf]

## Charged Porous organic frameworks bearing heteroatoms with enhanced isosteric enthalpies of gas adsorption

Guolong Xing, Tingting Yan, Saikat Das, Ling Ye, and Kaiqi Ye\*

State Key Laboratory of Supramolecular Structure and Materials, College of Chemistry, Jilin University, Changchun 130012, PR China.

\*E-mail: yekq@jlu.edu.cn

### Supporting Information

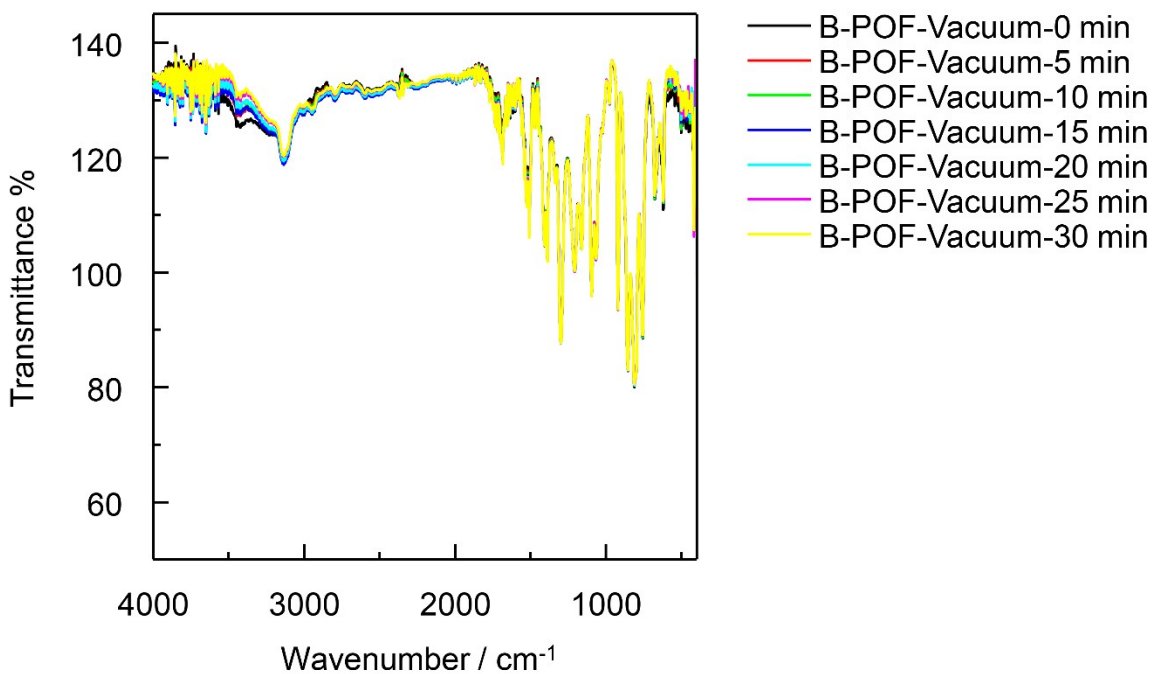

Figure S1. FT-IR spectrum of B-POF under vacuum for different time.

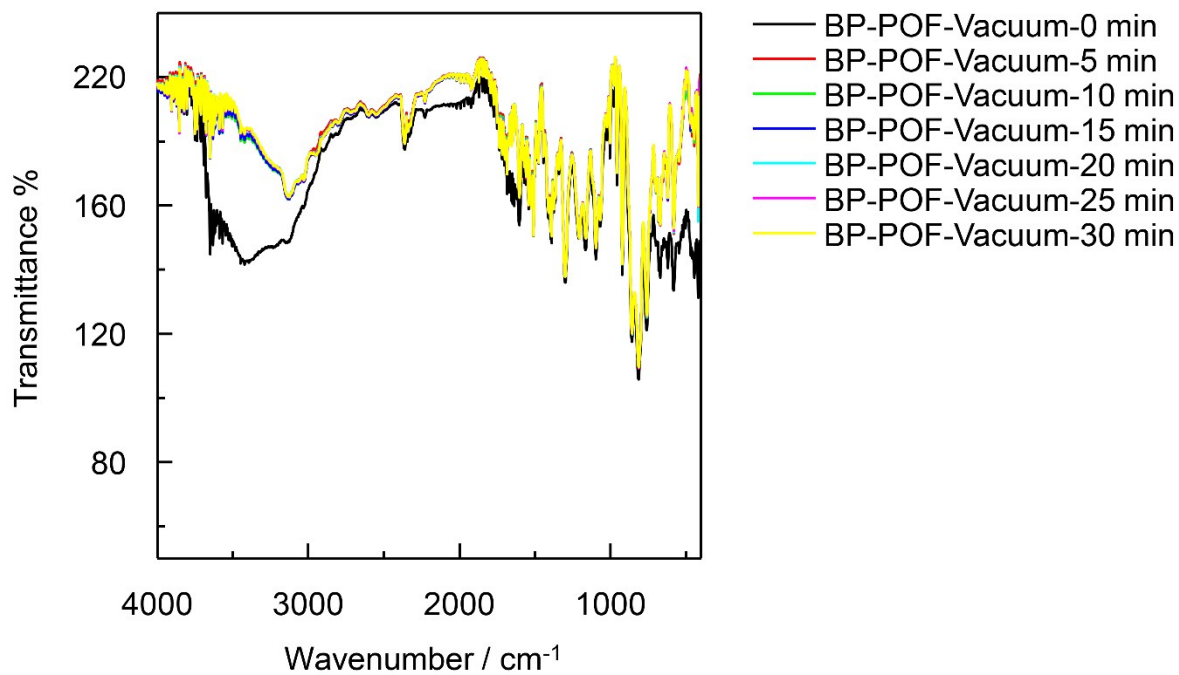

**Figure S2.** FT-IR spectrum of BP-POF under vacuum for different time.

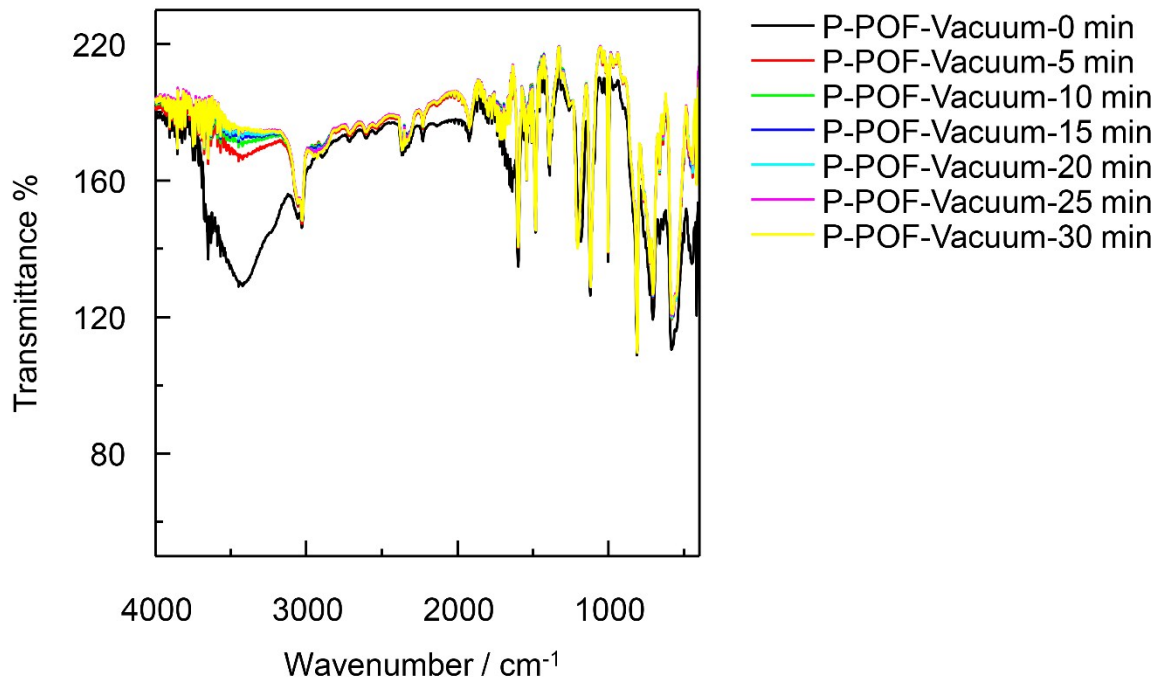

**Figure S3.** FT-IR spectrum of P-POF under vacuum for different time.

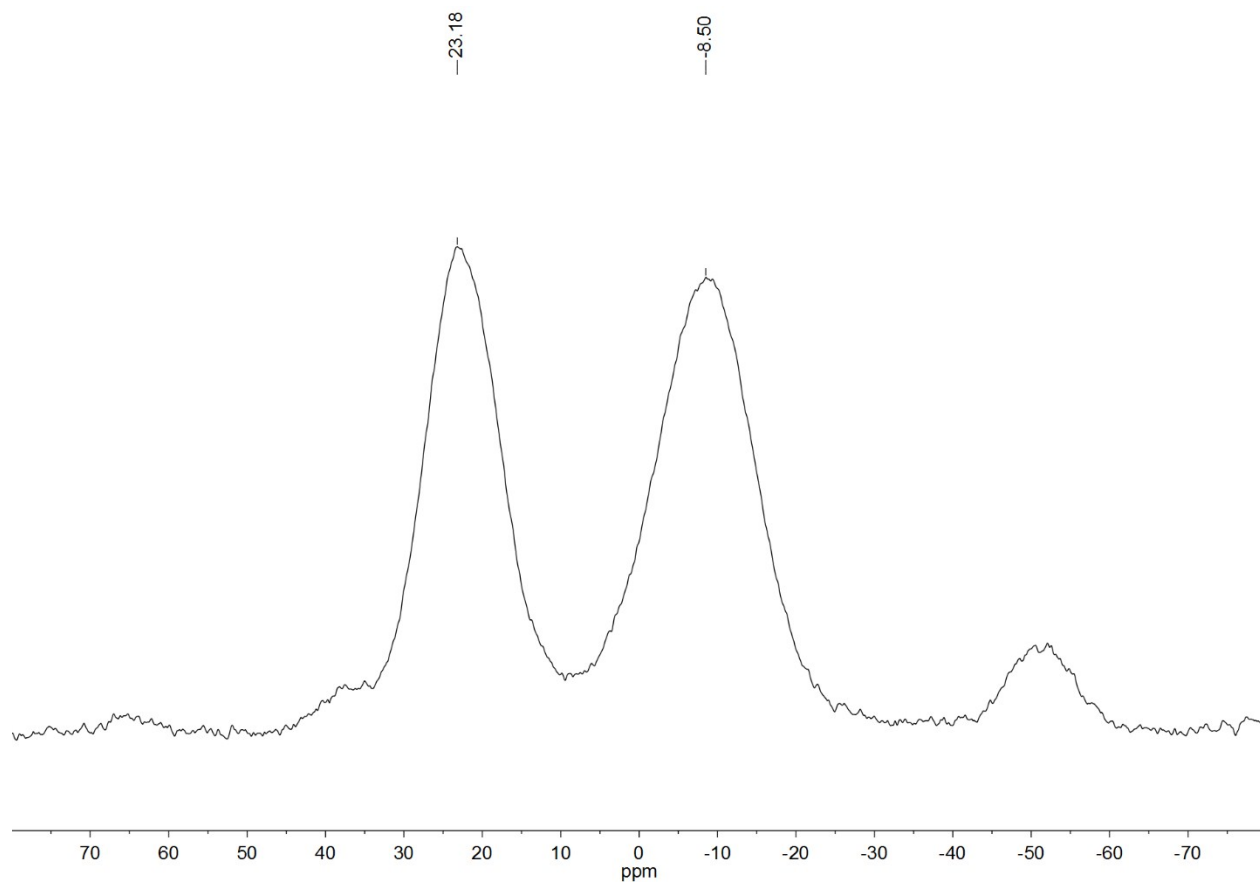

**Figure S4.**  $^{31}\text{P}$  solid state NMR spectra of BP-POF.

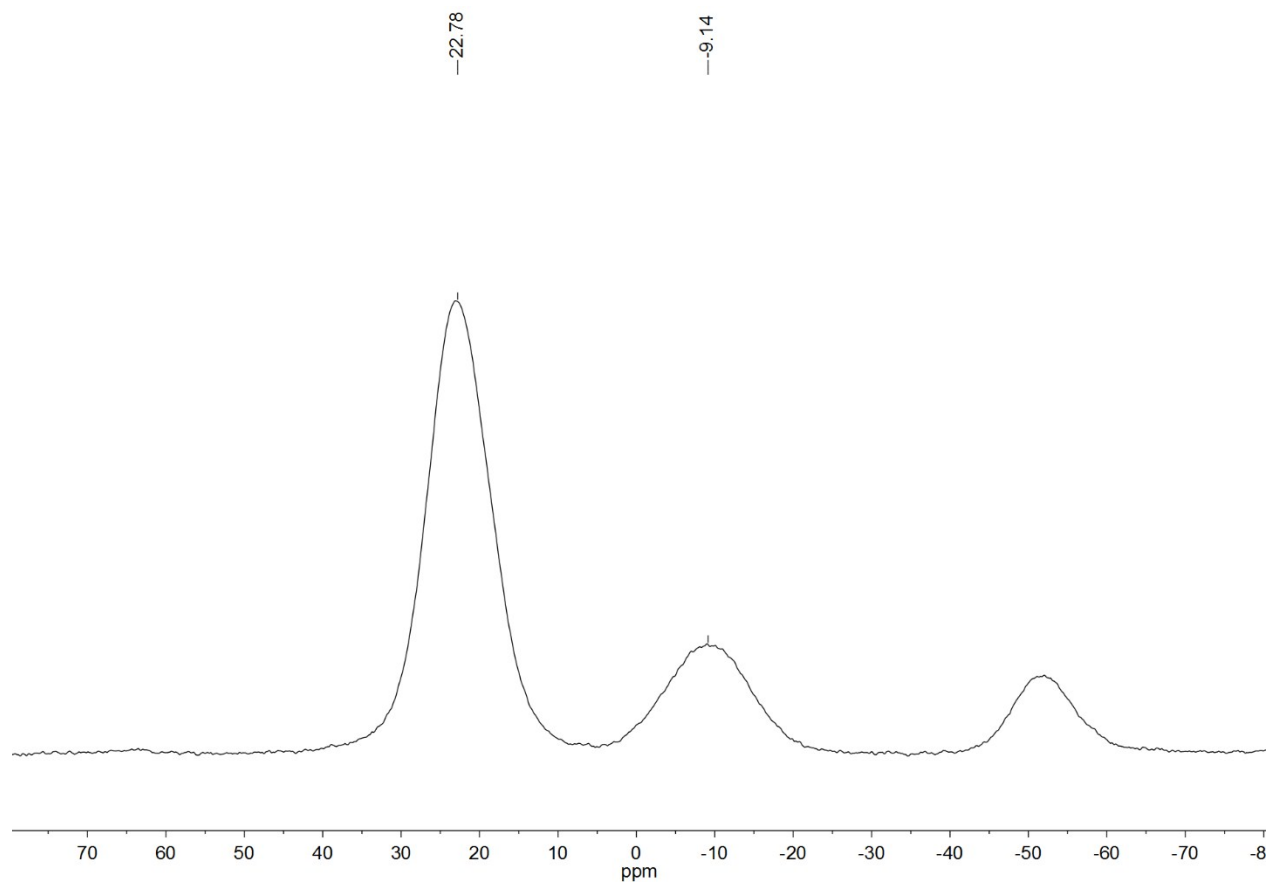

**Figure S5.**  $^{31}\text{P}$  solid state NMR spectra of P-POF.

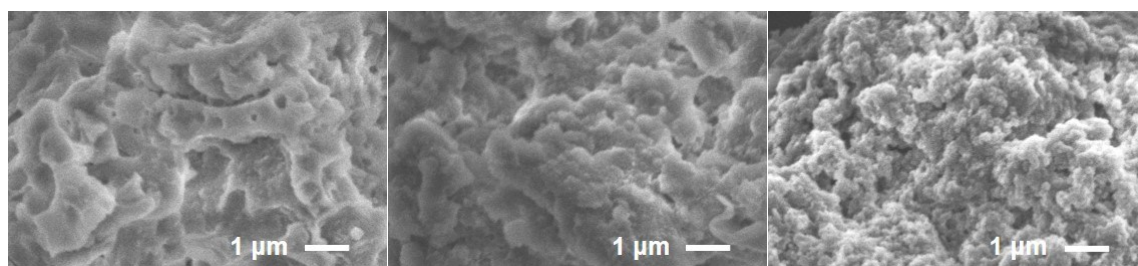

**Figure S6.** SEM images of (left) B-POF, (middle) BP-POF and (right) P-POF.

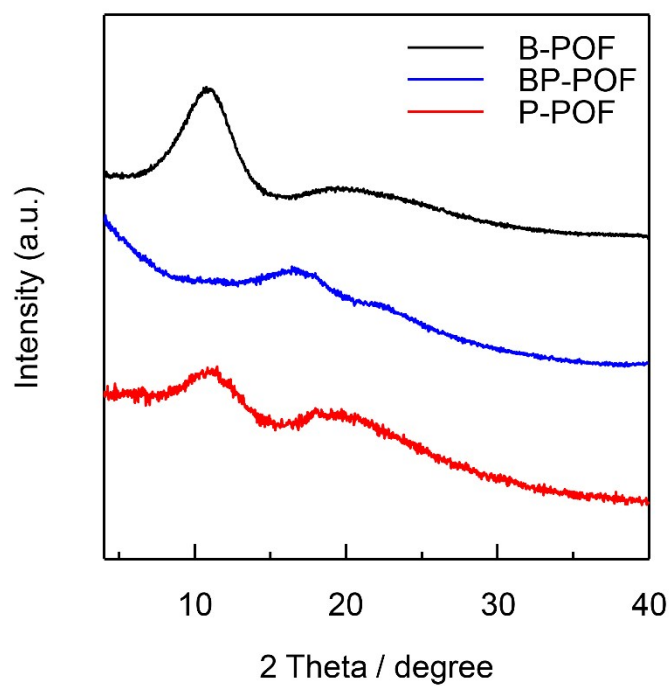

**Figure S7.** PXRD patterns of B-POF (black), BP-POF(blue) and P-POF(red).

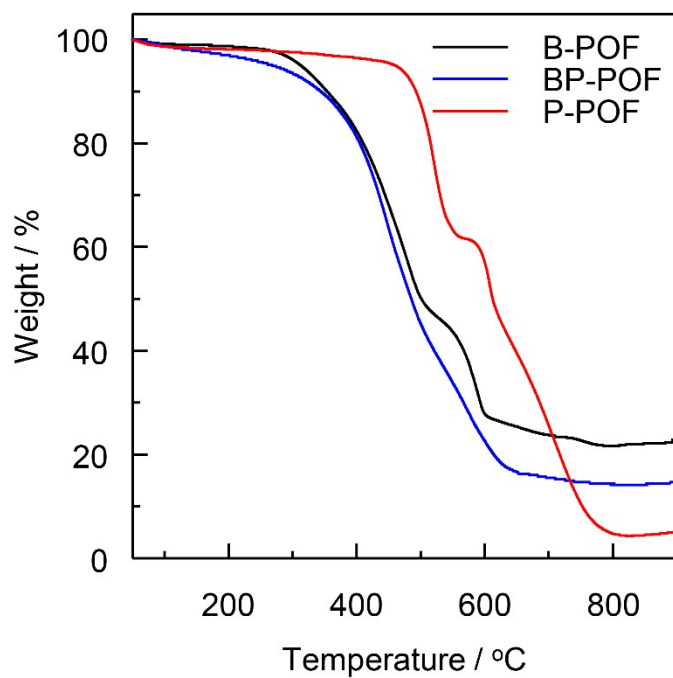

**Figure S8.** TGA plots of B-POF (black), BP-POF(blue) and P-POF(red).

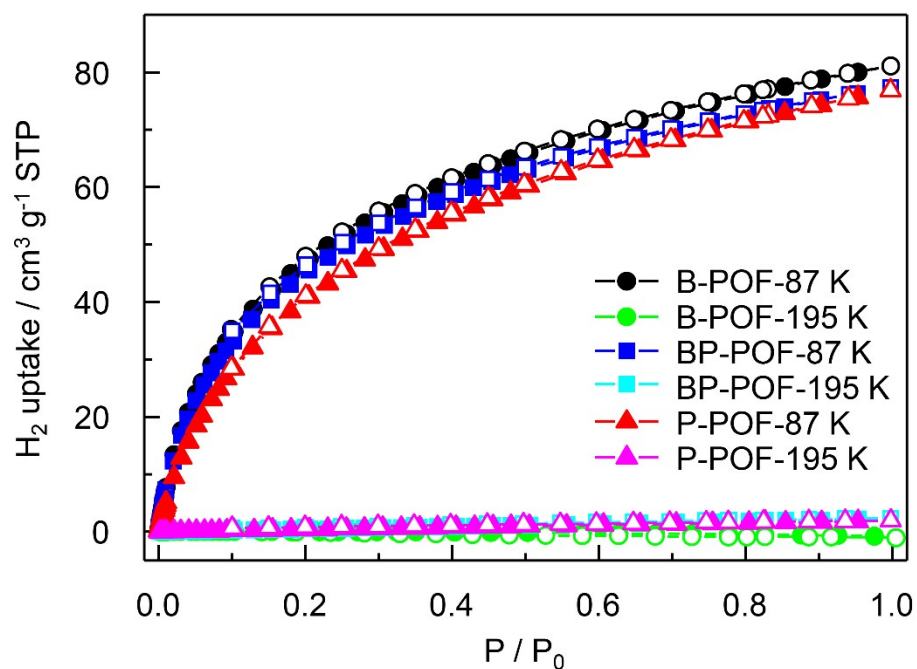

**Figure S9.** H<sub>2</sub> adsorption isotherms of B-POF (circle), BP-POF (square) and P-POF (triangle) at 87 K (solid symbols, adsorption; open symbols, desorption).

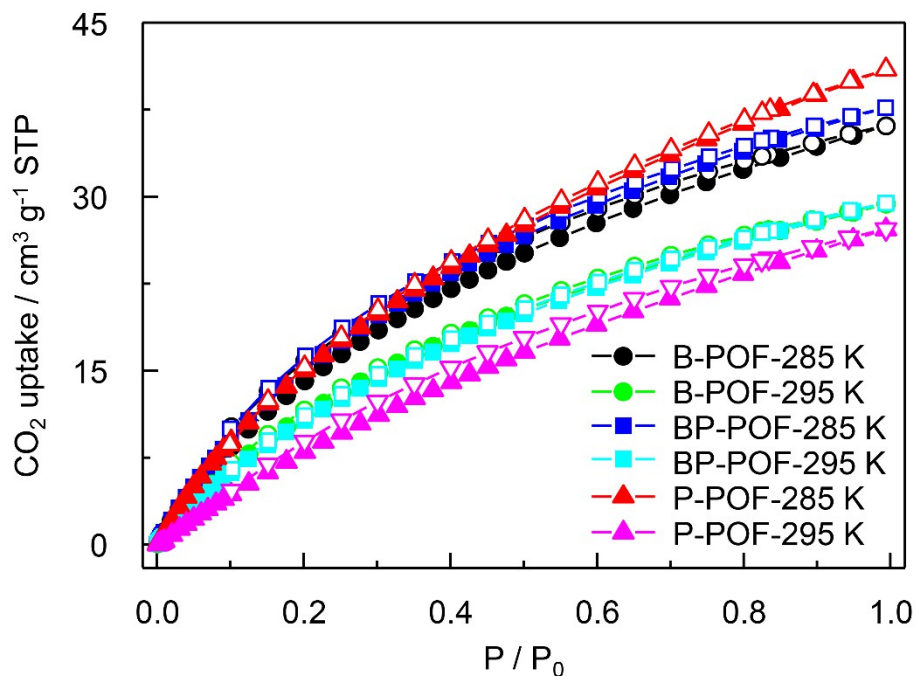

**Figure S10.** CO<sub>2</sub> adsorption isotherms of B-POF (circle), BP-POF (square) and P-POF (triangle) at 295 K (solid symbols, adsorption; open symbols, desorption).

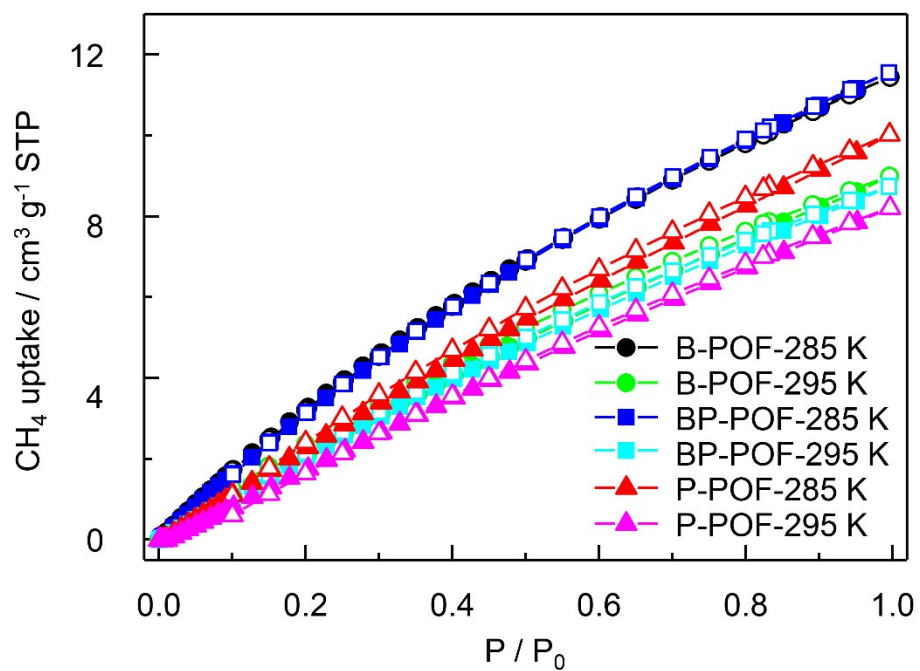

**Figure S11.** CH<sub>4</sub> adsorption isotherms of B-POF (circle), BP-POF (square) and P-POF (triangle) at 295 K (solid symbols, adsorption; open symbols, desorption).

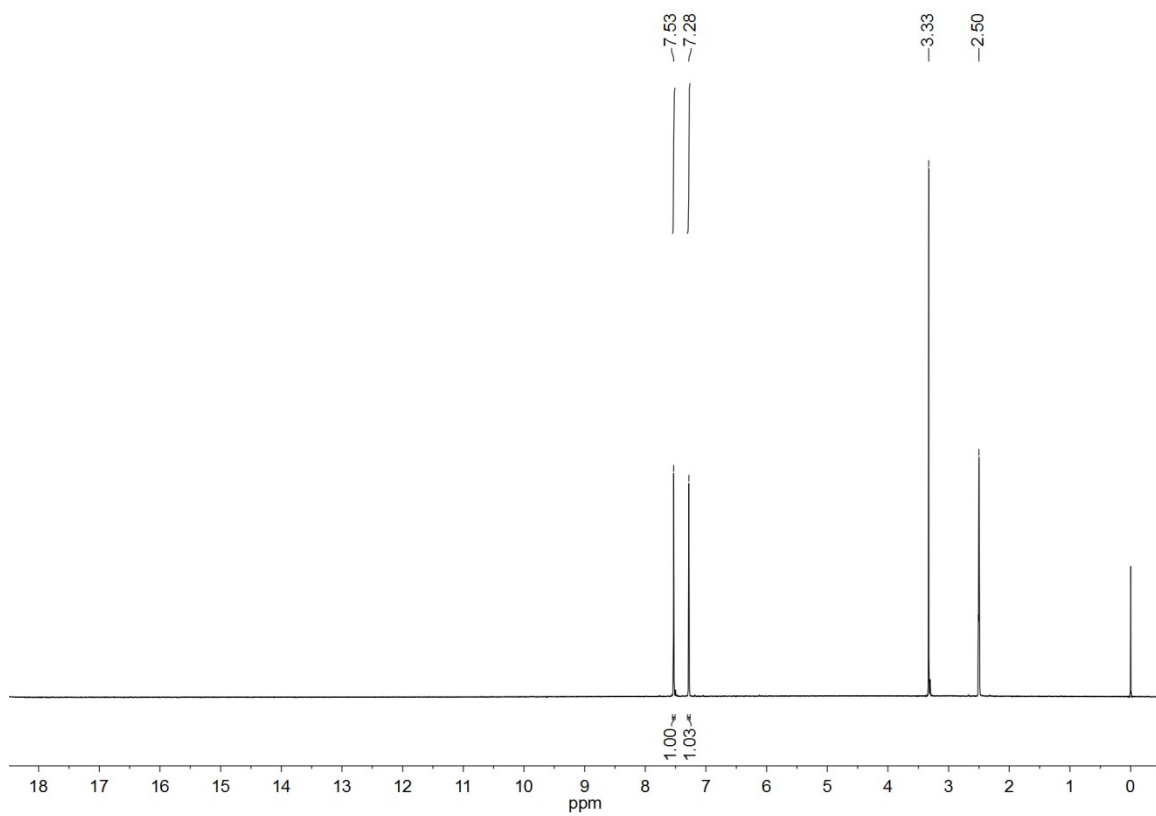

**Figure S12.**  $^1\text{H}$  NMR spectra of  $\text{K}[\text{B}(4\text{-Brpz})_4]$  in  $\text{DMSO}$  at room temperature.



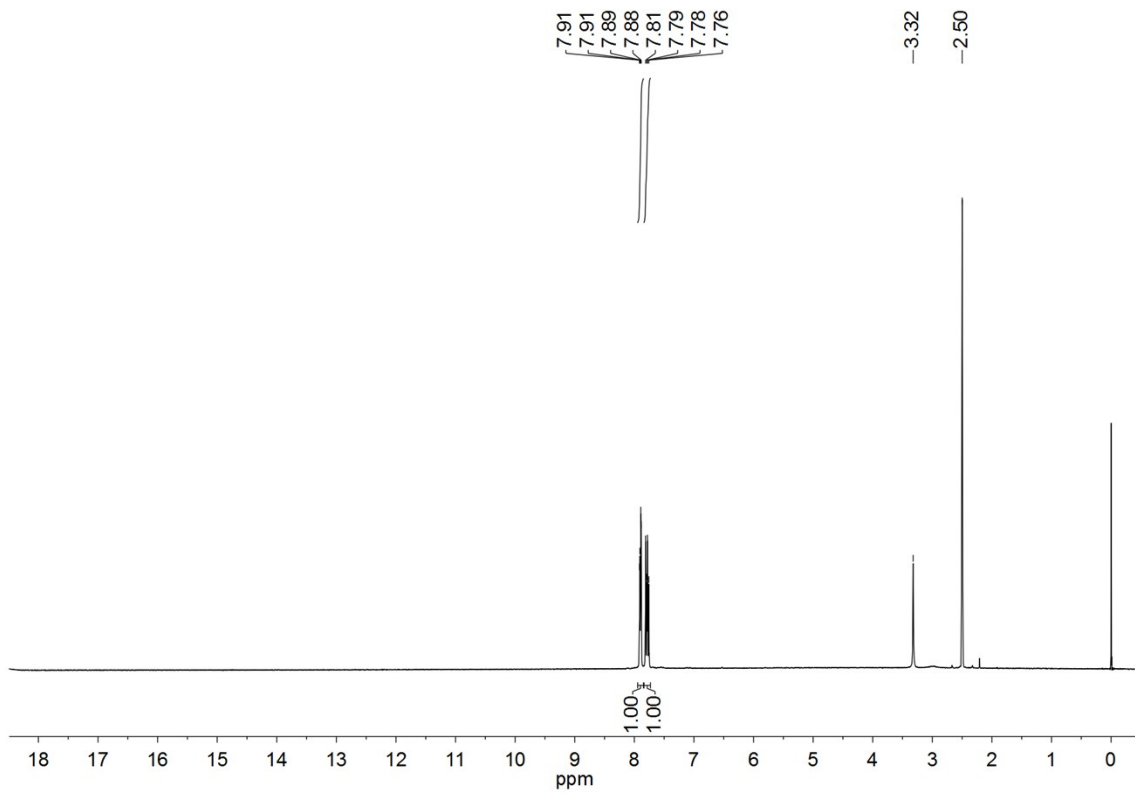

**Figure S13.**  $^1\text{H}$  NMR spectra of  $[\text{P}(\text{4-ClPh})_4]\text{Br}$  in DMSO at room temperature.

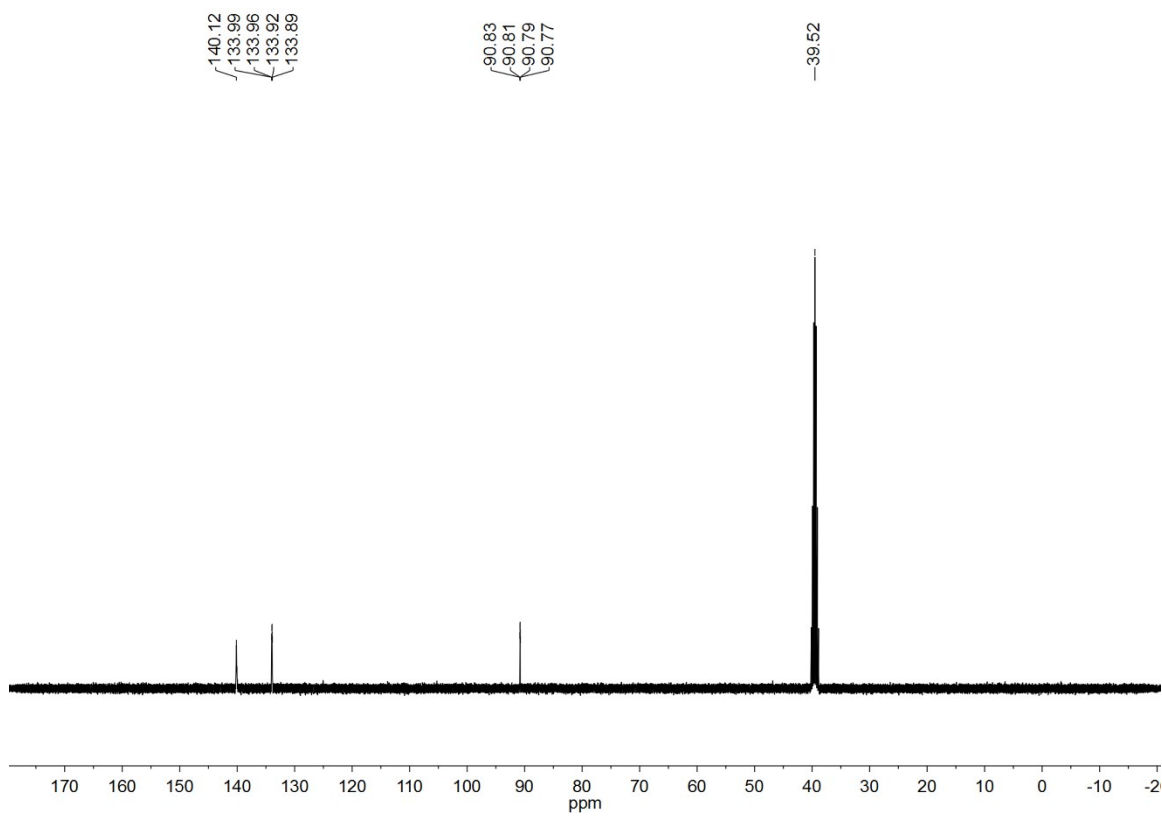

**Figure S14.**  $^{13}\text{C}$  NMR spectra of  $\text{K}[\text{B}(4\text{-Brpz})_4]$  in DMSO at room temperature.

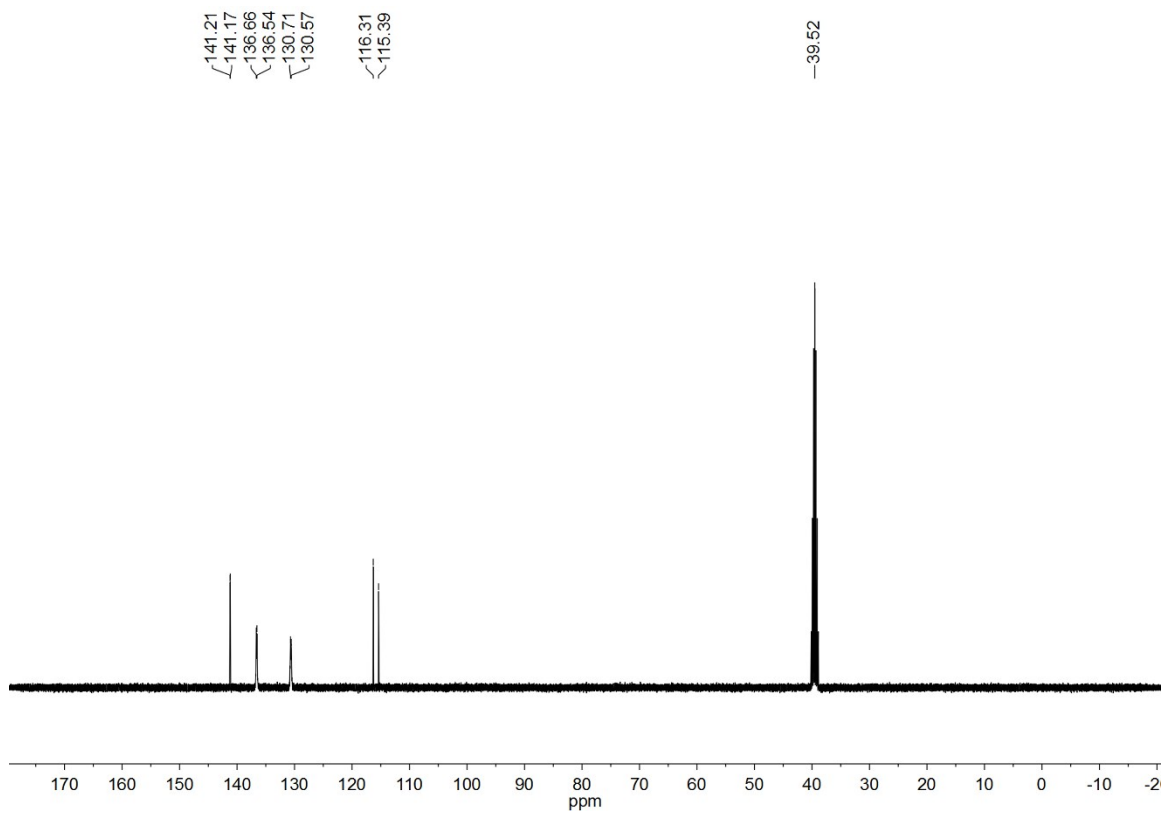

**Figure S15.**  $^{13}\text{C}$  NMR spectra of  $[\text{P}(4\text{-ClPh})_4]\text{Br}$  in DMSO at room temperature.

**Table S1** Comparison of BET surface area, CO<sub>2</sub>, CH<sub>4</sub>, H<sub>2</sub> sorption capabilities, and isosteric enthalpies for B-POF, BP-POF and P-POF with other porous organic materials.

| Porous organic materials | S <sub>BET</sub> | H <sub>2</sub> Uptake (cm <sup>3</sup> g <sup>-1</sup> ) | Q <sub>stH<sub>2</sub></sub> (kJ mol <sup>-1</sup> ) | CO <sub>2</sub> Uptake (cm <sup>3</sup> g <sup>-1</sup> ) | Q <sub>stCO<sub>2</sub></sub> (kJ mol <sup>-1</sup> ) | CH <sub>4</sub> Uptake (cm <sup>3</sup> g <sup>-1</sup> ) | Q <sub>stCH<sub>4</sub></sub> (kJ mol <sup>-1</sup> ) | Ref.      |
|--------------------------|------------------|----------------------------------------------------------|------------------------------------------------------|-----------------------------------------------------------|-------------------------------------------------------|-----------------------------------------------------------|-------------------------------------------------------|-----------|
| B-POF                    | 515              | 103.3                                                    | 8.5                                                  | 46.0                                                      | 32.3                                                  | 13.8                                                      | 22.4                                                  | This work |
| P-POF                    | 629              | 102.8                                                    | 7.8                                                  | 48.4                                                      | 35.2                                                  | 13.3                                                      | 21.4                                                  | This work |
| BP-POF                   | 223              | 100.0                                                    | 7.9                                                  | 43.5                                                      | 27.7                                                  | 13.6                                                      | 21.5                                                  | This work |
| PAF-1                    | 5600             | 186                                                      | 4.6                                                  | 46                                                        | 15.6                                                  | 18                                                        | 14.0                                                  | 1         |
| COF-102                  | 3620             | ~136                                                     | 3.9                                                  | ~28.5                                                     | -                                                     | -                                                         | -                                                     | 2         |
| HCP-1                    | 1646             | -                                                        | -                                                    | 38                                                        | ~23.5                                                 | -                                                         | -                                                     | 3         |
|                          |                  |                                                          |                                                      | (1 bar 298 K)                                             |                                                       |                                                           |                                                       |           |
| CTF-1                    | 746              | -                                                        | -                                                    | 55.3                                                      | ~27.5                                                 | -                                                         | -                                                     | 4         |
| FCTF-1                   | 662              | -                                                        | -                                                    | 104.6                                                     | ~35                                                   | -                                                         | -                                                     | 5         |
| BILP-1                   | 1172             | ~212.8                                                   | 7.9                                                  | ~95.7                                                     | 26.5                                                  | ~32.2                                                     | 16.3                                                  | 5         |
| BILP-3                   | 1306             | ~235                                                     | 8.0                                                  | ~114                                                      | 28.6                                                  | ~34                                                       | 16.6                                                  | 6         |
| BILP-6                   | 1261             | ~246                                                     | 8.2                                                  | ~108                                                      | 28.4                                                  | ~38                                                       | 13.2                                                  | 6         |
| PMOP-1                   | 806              | -                                                        | -                                                    | ~65.5                                                     | 18.5                                                  | ~17.7                                                     | ~11                                                   | 7         |
| PMOP-2                   | 559              | -                                                        | -                                                    | ~57.8                                                     | 18.9                                                  | ~15.2                                                     | ~11                                                   | 7         |
| PCTF 1-7                 | 79-2235          | ~101.7-~212.3                                            | -                                                    | 41.5-73.0                                                 | 25-30                                                 | 14.6-23.6                                                 | -                                                     | 8         |
| CTF-DCBT                 | 500              | -                                                        | -                                                    | 37.8                                                      | 44.2                                                  | 8.9                                                       | 22.8                                                  | 9         |
|                          |                  |                                                          |                                                      | (1 bar 298 K)                                             |                                                       | (1 bar 298 K)                                             |                                                       |           |
| BDPCMP-1-4               | 482-725          | ~90.3-~115.4<br>(77.3 K, 1.13 bar)                       | -                                                    | ~37.6-~50.4<br>(273 K, 1.13 bar)                          | 23-27.3                                               | ~10.8-~15.7<br>(273 K, 1.13 bar)                          | -                                                     | 10        |
| N4CMP-1-5                | 592-1426         | -                                                        | -                                                    | ~45.9-~81.1                                               | 25.5-35.1                                             | -                                                         | -                                                     | 11        |
| Polycarbazole CPOP-1     | 2220             | ~322.6                                                   | -                                                    | 137.0                                                     | 27                                                    | -                                                         | -                                                     | 12        |
| P-THIDT                  |                  |                                                          |                                                      |                                                           | 29                                                    |                                                           |                                                       | 13        |
| P-DTBDT                  |                  |                                                          |                                                      |                                                           |                                                       |                                                           |                                                       | 13        |
| pre-GNF                  | 672              | ~102.9                                                   | 6.6                                                  | ~38.2                                                     | 29.8                                                  | ~13.3                                                     | 22.7                                                  | 14        |
| GNF-1                    | 679              | ~116.6                                                   | 7.7                                                  | ~48.2                                                     | 28.7                                                  | ~16.1                                                     | 24.1                                                  | 14        |
| CMP 0-5                  | 512-1018         | 67-155                                                   | ~10                                                  | -                                                         | -                                                     | -                                                         | -                                                     | 15        |
| JUC-Z7-10                | 3305-4889        | 217-245                                                  | 5.63-6.88                                            | 58-85                                                     | 15.94-23.17                                           | 23-27                                                     | 15.69-15.96                                           | 16        |
| Carbazole-based CMPs     | 540-917          | ~108.6-~192.5<br>(77.3 K, 1.13 bar)                      | -                                                    | ~43.9-~65.6                                               | 27.1-30.8                                             | ~14.6-~22.6                                               | -                                                     | 17        |
| Isoidigo-based MOPs      | 654-763          | ~107.4-~139.5<br>(77.3 K, 1.13 bar)                      | -                                                    | ~55.1-~73.9                                               | 27.4-33.5                                             | ~16.8-~19.3                                               | -                                                     | 18        |
| CPN-1-Br                 |                  |                                                          |                                                      | ~55.8                                                     | 31.0                                                  | -                                                         | -                                                     | 19        |
| cCTFs                    | 744-1247         | -                                                        | -                                                    | ~50.4-~67.7                                               | 43-49                                                 | -                                                         | -                                                     | 20        |

## Reference

1. T. Ben, Y. Li, L. Zhu, D. Zhang, D. Cao, Z. Xiang, X. Yao and S. Qiu, *Energy Environ. Sci.*, 2012, **5**, 8370-8376.
2. H. Furukawa and O. M. Yaghi, *J. Am. Chem. Soc.*, 2009, **131**, 8875-8883.
3. C. F. Martin, E. Stöckel, R. Clowes, D. J. Adams, A. I. Cooper, J. J. Pis, F. Rubiera and C. Pevida, *J. Mater. Chem.*, 2011, **21**, 5475-5483.
4. Y. Zhao, K. X. Yao, B. Teng, T. Zhang and Y. A. Han, *Energy Environ. Sci.*, 2013, **6**, 3684-3692.
5. M. G. Rabbani and H. M. El-Kaderi, *Chem. Mater.*, 2011, **23**, 1650-1653.
6. M. G. Rabbani, T. E. Reich, R. M. Kassab, K. T. Jackson and H. M. El-Kaderi, *Chem. Commun.*, 2012, **48**, 1141-1143.
7. J. Liu, Y. Liu, X. Jiang, Y. Luo and Y. Lyu, *Microporous and Mesoporous Materials*, 2017, **250**, 203-209.

8. A. Bhunia, I. Boldog, A. Möller and C. Janiak, *J. Mater. Chem. A*, 2013, **1**, 14990.
9. K. Wang, Y. Tang, Q. Jiang, Y. Lan, H. Huang, D. Liu and C. Zhong, *Journal of Energy Chemistry*, 2017, **26**, 902-908.
10. Y. Xu, D. Chang, S. Feng, C. Zhang and J.-X. Jiang, *New Journal of Chemistry*, 2016, **40**, 9415-9423.
11. G. Li, L. Qin, C. Yao and Y. Xu, *Sci. Rep.*, 2017, **7**, 15394.
12. Q. Chen, M. Luo, P. Hammershoj, D. Zhou, Y. Han, B. W. Laursen, C. G. Yan and B. H. Han, *J. Am. Chem. Soc.*, 2012, **134**, 6084-6087.
13. H. Liu, Q. Li, Q. Li, W. Jin, X. Li, A. Hameed and S. Qiao, *Poly. Chem.*, 2017, **8**, 6733-6740.
14. Y. Byun and A. Coskun, *Chem. Mater.*, 2015, **27**, 2576-2583.
15. J.-X. Jiang, F. Su, A. Trewin, C. D. Wood, H. Niu, J. T. A. Jones, Y. Z. Khimyak, A. I. Cooper, *J. Am. Chem. Soc.*, 2008, **130**, 7710-7720.
16. C. Pei, T. Ben, Y. Li and S. Qiu, *Chem. Commun.*, 2014, **50**, 6134-6136.
17. X. Wang, Y. Zhao, L. Wei, C. Zhang, X. Yang, M. Yu and J.-X. Jiang, *Macromolecular Chemistry and Physics*, 2015, **216**, 504-510.
18. Y. Zhao, X. Wang, C. Zhang, F. Xie, R. Kong and J.-X. Jiang, *RSC Adv.*, 2015, **5**, 100322-100329.
19. S. Fischer, A. Schimanowitz, R. Dawson, I. Senkovska, S. Kaskel and A. Thomas, *J. Mater. Chem. A*, 2014, **2**, 11825-11829.
20. O. Buyukcakir, S. H. Je, S. N. Talapaneni, D. Kim and A. Coskun, *ACS Appl. Mater. Interfaces*, 2017, **9**, 7209-7216.
